# Supplementary material for: Imparting magnetic functionality to iron-based MIL-101 via facile Fe3O4 nanoparticle encapsulation: an efficient and recoverable catalyst for aerobic oxidation
Source: Royal Society of Chemistry journal article supplement (doi:10.1039/c5ra17180f), 2015-01-01
Supplement: c5ra17180f1.pdf [file c5ra17180f1.pdf]

Imparting magnetic functionality to iron-based MIL-101 via facile  $\text{Fe}_3\text{O}_4$  nanoparticles encapsulation: an efficient and recoverable catalyst for aerobic oxidations

Zhaokui Jin,<sup>a</sup> Yi Luan,<sup>a</sup> Mu Yang,<sup>a</sup> Jia Tang,<sup>a</sup> Jingjing Wang,<sup>a</sup> Hongyi Gao,<sup>a</sup> Yunfeng Lu<sup>b</sup> and Ge Wang<sup>\*a</sup>

<sup>a</sup>Beijing Key Laboratory of Function Materials for Molecule & Structure Construction, School of Material Science and Engineering, University of Science and Technology Beijing, Beijing, 30 Xueyuan Road, 100083, P. R. China. E-mail: gewang@126.com

<sup>b</sup>Department of Chemical and Biomolecular Engineering, University of California, Los Angeles, CA 90095, USA.

## Supporting Information

### 1. Preparation of $\text{Fe}_3\text{O}_4/\text{Fe-88B}$

As control,  $\text{Fe}_3\text{O}_4/\text{Fe-MIL-88B}$  was synthesized by a similar method. A solution containing  $\text{FeCl}_3 \cdot 6\text{H}_2\text{O}$  (2.984 g, 5.52 mmol),  $\text{H}_2\text{BDC}$  (0.917 g, 11.04 mmol), 15 mL DMF, 12 mL  $\text{Fe}_3\text{O}_4$  source solution was dispersed by ultrasonication, and then the suspension was transferred into a 50 mL Teflon liner steel autoclave and reacted at 170 °C for 24 h. After cooling to room temperature, a brick-red precipitate was obtained by centrifugation, washed with DMF two times each day for two days to activate the composite. The brick-red solid was washed with methanol in the same way to replace DMF. Finally, the solid was dried at 80 °C for 24 h.

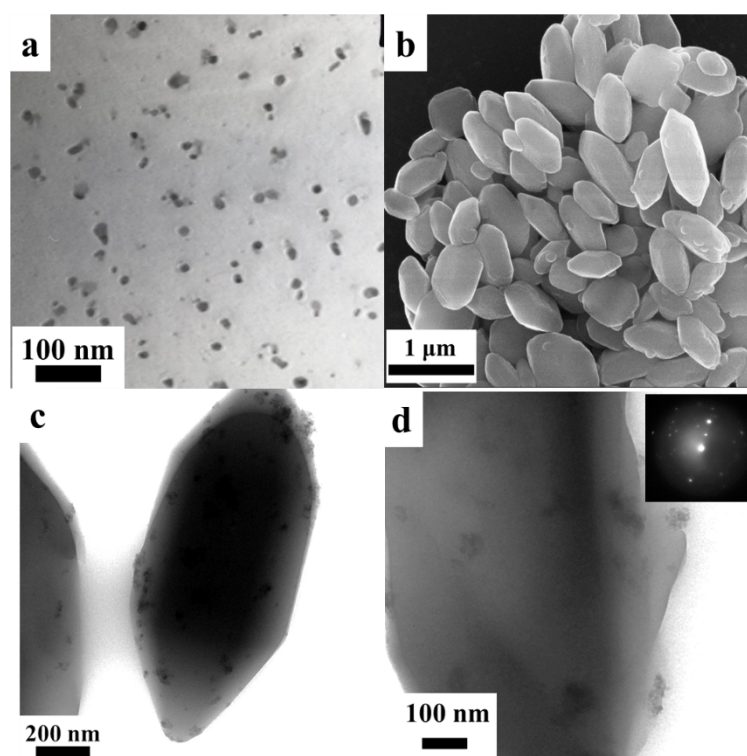

**Fig. S1** (a) TEM image of PAA-modified  $\text{Fe}_3\text{O}_4$  nanoparticles; (b) SEM image of **F2**; (c) and (d) TEM images of **F2**. The insert in (d) is the corresponding selected area electron diffraction (SAED) SAED pattern.

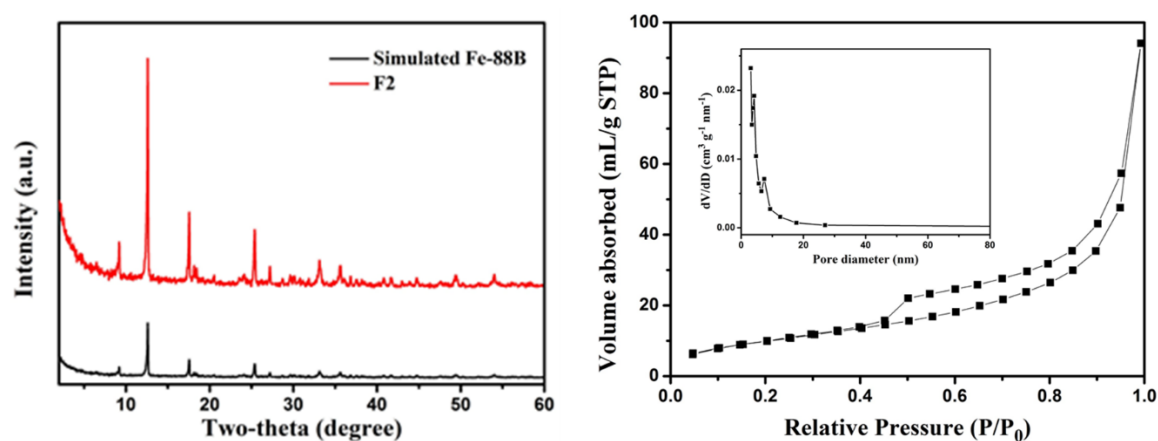

**Fig. S2** (a) XRD patterns of the simulated from the crystallographic data of Fe-MIL-88B and F2; (b) Nitrogen adsorption–desorption isotherms of F2, and its corresponding pore size distribution curve.

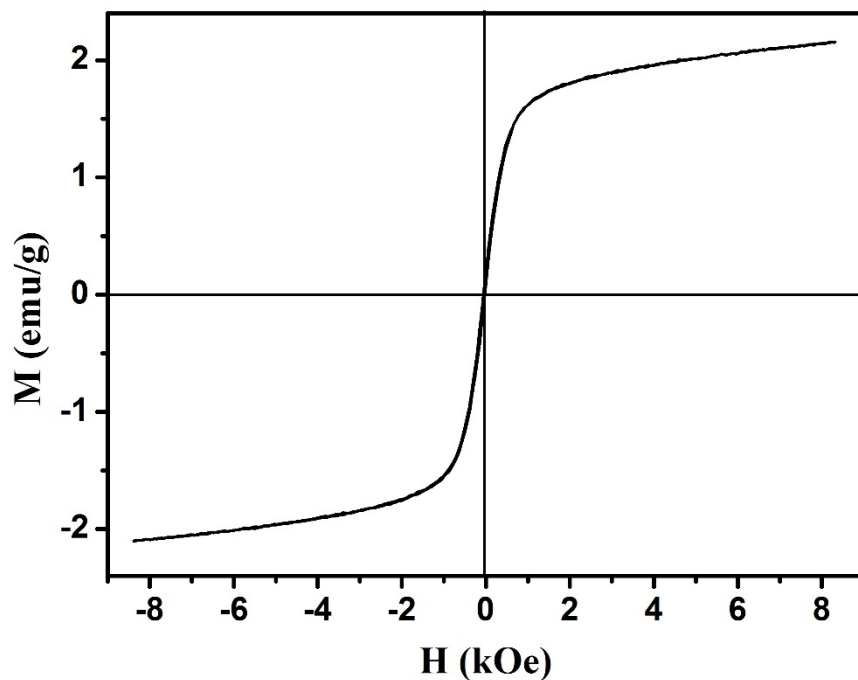

**Fig. S3** VSM curves of F2 at room temperature.

## 2. Characterization of the recycled catalyst F1

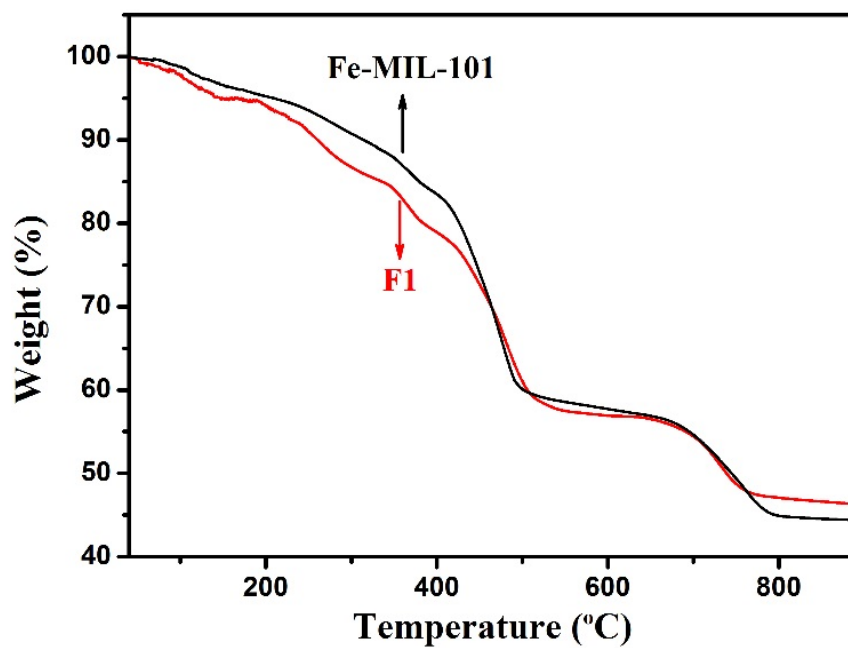

Fig. S4 TG curves of Fe-MIL-101 and as-prepared F1.

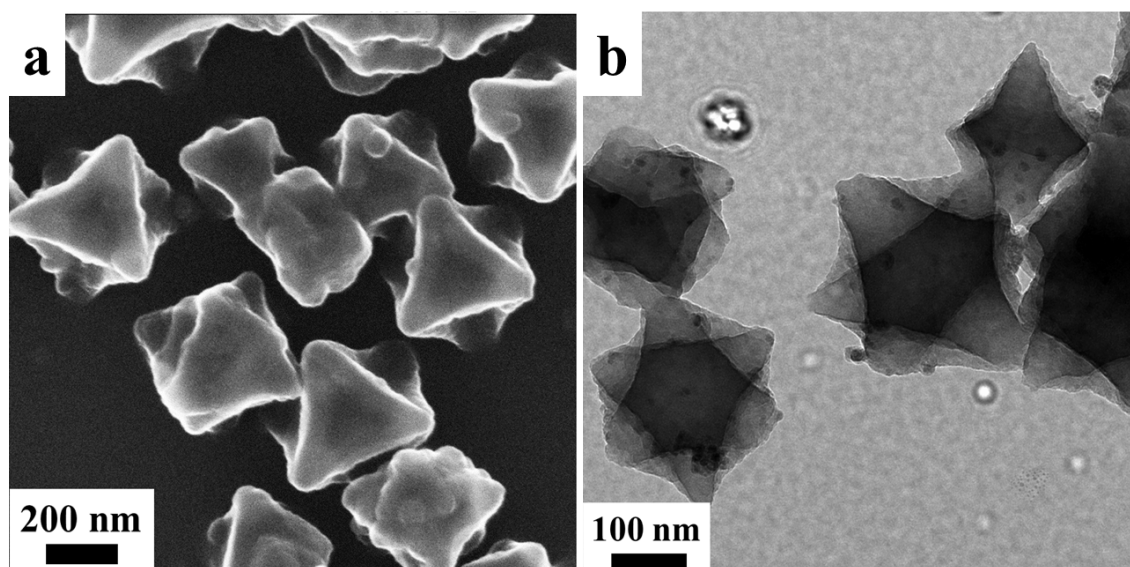

Fig. S5 SEM (a) and TEM (b) images of F1 after eight runs.

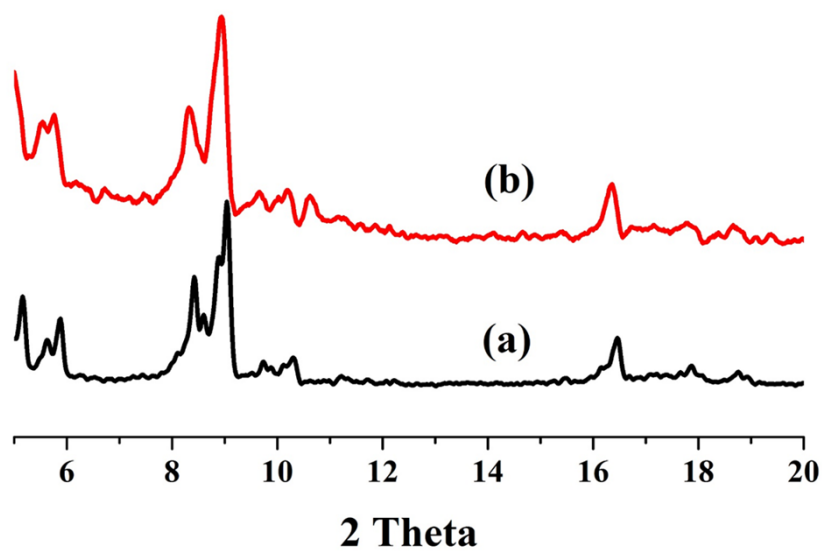

**Fig. S6** XRD patterns of (a) **F1** before reaction and (b) after eight runs.

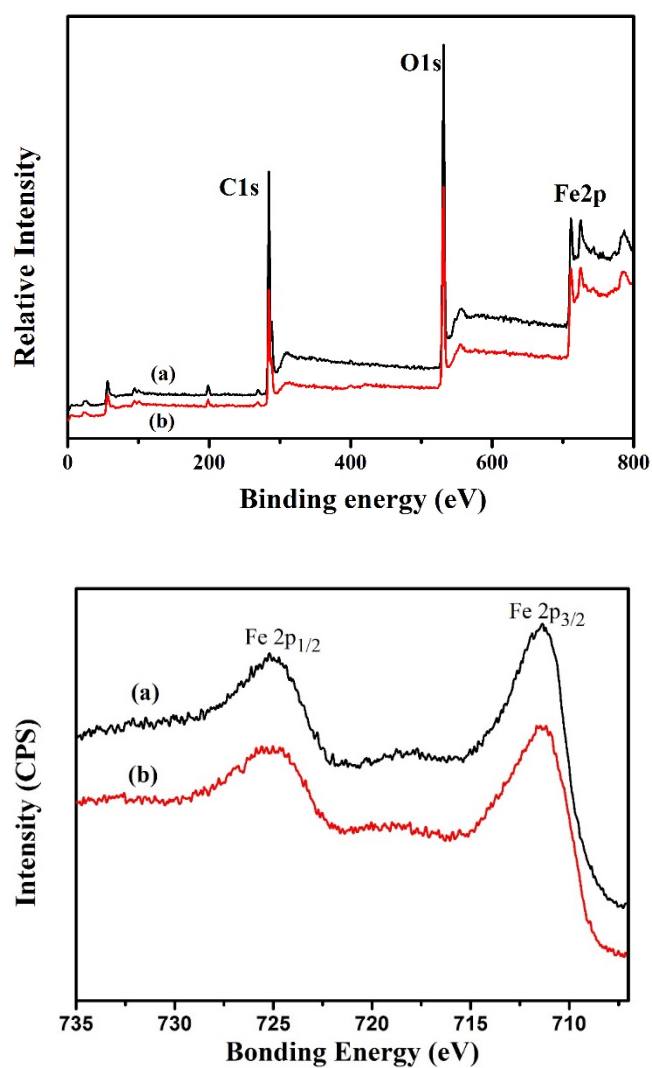

**Fig. S7** XPS spectra (above) and the high resolution Fe2p spectra (below) of (a) **F1** before reaction and (b) after eight runs

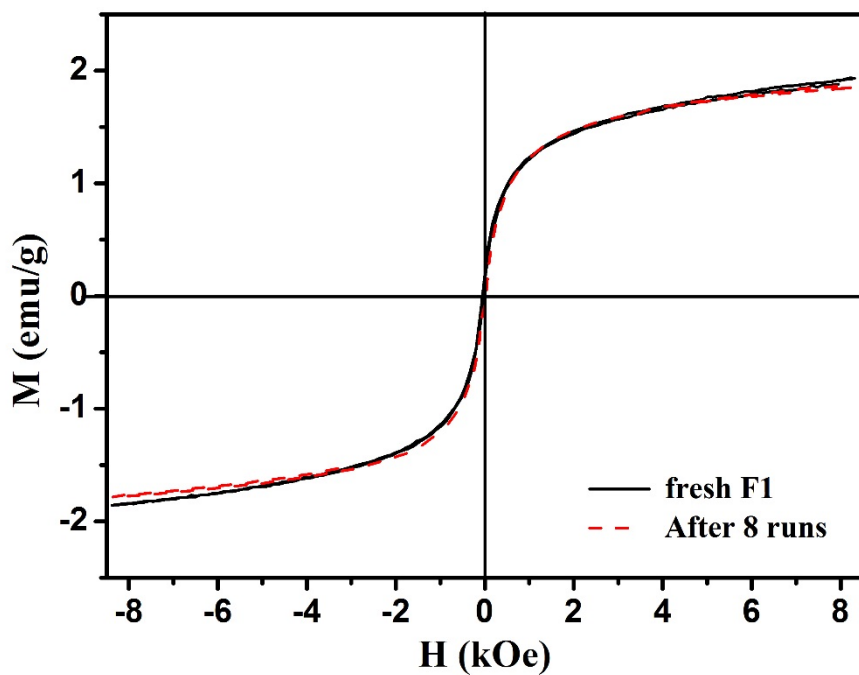

Fig. S8 VSM curves of F1 before reaction and after eight runs.

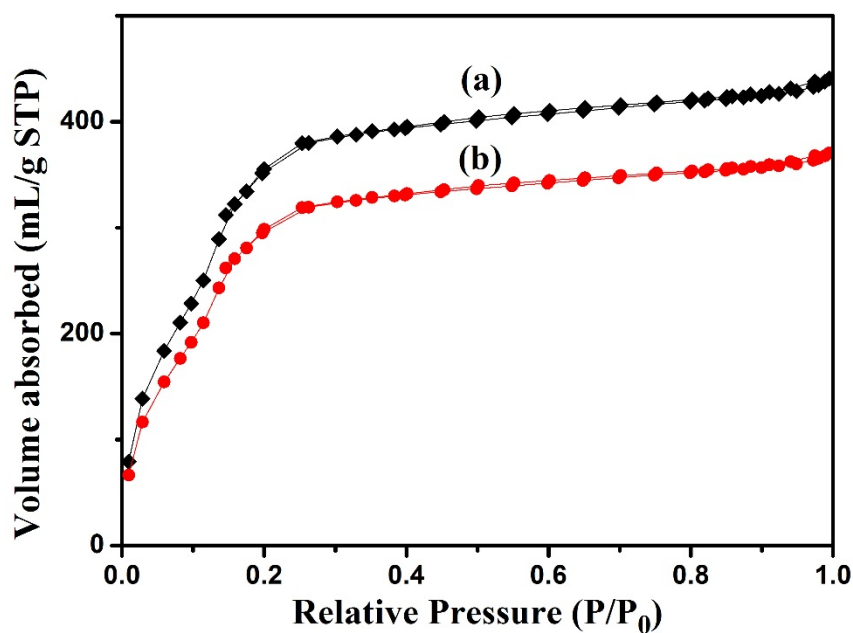

Fig. S9 Nitrogen adsorption isotherms of (a) F1 before reaction and (b) after eight runs.

### 3. Catalytic performance evaluation

**Table S1.** A comparison of catalytic activity of different catalysts in aerobic oxidation of Benzyl alcohol.

| Entry | Catalyst                         | Mol% | Time/h | Solvent                         | T/°C | Yield | TON | Ref. |
|-------|----------------------------------|------|--------|---------------------------------|------|-------|-----|------|
| 1     | Octahedral molecular sieves      | 50   | 4      | PhCH <sub>3</sub>               | 110  | 85%   | 1.7 | 1    |
| 2     | Cu <sub>2</sub> Mn               | 10   | 6      | CH <sub>2</sub> Cl <sub>2</sub> | 120  | 98%   | 9.8 | 2    |
| 3     | CuFe <sub>2</sub> O <sub>4</sub> | 10   | 24     | H <sub>2</sub> O                | 100  | 95%   | 9.5 | 3    |

|   |                                            |      |    |                          |    |     |      |           |
|---|--------------------------------------------|------|----|--------------------------|----|-----|------|-----------|
| 4 | MCM-41-TEMPO/CuCl                          | 5    | 48 | DMF                      | 25 | 35  | 7    | 4         |
| 5 | CuCl/TEMPOIL/MS3A                          | 5    | 5  | [bmim][PF <sub>6</sub> ] | 80 | 98  | 13.6 | 5         |
| 6 | FeMPA                                      | 1.67 | 20 | CH <sub>3</sub> CN       | 80 | 35% | 21   | 6         |
| 7 | Cu <sub>3</sub> (BTC) <sub>2</sub>         | 25.5 | 22 | CH <sub>3</sub> CN       | 75 | 89% | 3.5  | 7         |
| 8 | Fe <sub>3</sub> O <sub>4</sub> /Fe-MIL-101 | 10   | 14 | CH <sub>3</sub> CN       | 75 | 99% | 9.9  | This work |

1. Y. C. Son, V. D. Makwana, A. R. Howell, S. L. Suib, *Angew. Chem.* **2001**, *113*, 4410-4413.
2. G. Yang, J. Ma, W. Wang, J. Zhao, X. Lin, L. Zhou, X. Gao, *Catal. Lett.* **2006**, *112*, 83-87.
3. X. Zhu, D. Yang, W. Wei, M. Jiang, L. Li, X. Zhu, J. You, H. Wang, *RSC Adv.* **2014**, *4*, 64930-64935.
4. D. Brunel, F. Fajula, J. B. Nagy, B. Deroide, M. J. Verhoef, L. Veum, J. A. Peters, H. van Bekkum, *Appl. Catal. A: Gen.* **2001**, *213*, 73-82.
5. L. Liu, J. Ma, L. Ji, Y. Wei, *J. Mol. Catal. A-chem.* **2008**, *291*, 1-4.
6. P. Nagaraju, N. Pasha, P. S. S. Prasad, N. Lingaiah, *Green Chem.* **2007**, *9*, 1126-1129
7. A. Dhakshinamoorthy, M. Alvaro, H. Garcia, *ACS Catal.* **2011**, *1*, 48-53.
